# Supplementary material for: Impact of Treatment with GLP1 Receptor Agonists, Liraglutide 3.0 mg and Semaglutide 1.0 mg, While on a Waiting List for Bariatric Surgery
Source: MDPI journal article supplement (doi:10.3390/biomedicines11102785), 2023-10-13
Supplement: s1 [file s1]

## SUPPLEMENTARY APPENDIX

Rubio-Herrera MA, Mera-Carreiro S, Sánchez-Pernaute A, Ramos-Leví AM. Impact of treatment with GLP1 receptor agonists, liraglutide 3.0 mg and semaglutide 1.0 mg, while on a waiting list for bariatric surgery. Biomedicines 2023

**Table S1. Characteristics of patients according to the decision of abandoning bariatric surgery after 52 weeks of pharmacological therapy with semaglutide 1.0 mg and liraglutide 3.0 mg**

| Characteristics                    | Semaglutide 1.0 mg<br>(n=35)                       |                             | Liraglutide 3.0 mg<br>(n=67)                       |                                |
|------------------------------------|----------------------------------------------------|-----------------------------|----------------------------------------------------|--------------------------------|
|                                    | Abandoning<br>bariatric<br>surgery plans<br>(n=23) | Bariatric<br>Surgery (n=12) | Abandoning<br>bariatric<br>surgery plans<br>(n=47) | Bariatric<br>Surgery<br>(n=20) |
| Age, years                         | 57.75±6.53                                         | 56.25±4.11                  | 52.09±11.16                                        | 47.15±11.85                    |
| Sex, female (%)                    | 15 (65.2%)                                         | 6 (50%)                     | 38 (80.9%)                                         | 12 (60.0%)                     |
| Baseline Body<br>weight, kg        | 117.23±13.81                                       | 118.80±14.35                | 112.33±19.36                                       | 136.69±40.88                   |
| Baseline BMI,<br>kg/m <sup>2</sup> | 43.07±4.16                                         | 43.01±4.62                  | 42.23±5.69                                         | 47.90±11.32                    |
| 52wk-BMI,<br>kg/m <sup>2</sup>     | 35.21±5.07                                         | 36.55±6.10                  | 34.53±4.83                                         | 41.98±8.79                     |
| <i>Comorbidities</i>               |                                                    |                             |                                                    |                                |
| Type 2 DM (%)                      | 23 (100%)                                          | 12 (100%)                   | 3 (6.4%)                                           | 1 (5.0%)                       |
| Hypertension (%)                   | 18 (78.3%)                                         | 9 (75.0%)                   | 16 (34.0%)                                         | 10 (50%)                       |
| Dyslipidemia (%)                   | 11 (47.8%)                                         | 8 (66.7%)                   | 16 (34.0%)                                         | 5 (25.0%)                      |
| Obstructive<br>Sleep Apnea (%)     | 7 (30.4%)                                          | 3 (25.0%)                   | 8 (17.0%)                                          | 4 (20.0%)                      |
| Knee<br>Osteoarthritis<br>(%)      | 4 (17.4%)                                          | 4 (33.3%)                   | 11 (23.4%)                                         | 4 (20.0%)                      |
| <i>WL(%)</i>                       |                                                    |                             |                                                    |                                |
| 26-wk                              | -13.43±6.30                                        | -10.57±3.31                 | -13.55±5.32                                        | -9.25±3.84                     |
| 52-wk                              | -18.33±7.73                                        | -14.01±4.86                 | -17.51±5.45                                        | -10.78±3.42                    |

**Table S2. Baseline and follow-up laboratory parameters\* according to the type of pharmacological treatment received.**

| <b>Laboratory tests</b>  | <b>Liraglutide<br/>(n=45)</b> |                     | <b>Semaglutide<br/>(n=32)</b> |                     |
|--------------------------|-------------------------------|---------------------|-------------------------------|---------------------|
|                          | <i>Baseline</i>               | <i>At 12 months</i> | <i>Baseline</i>               | <i>At 12 months</i> |
| Glycaemia (mg/dL)        | 100.70 ± 13.89                | 95.67 ± 9.01        | 133.97 ± 43.40                | 111.91 ± 23.80      |
| HbA1c (%)                | 5.61 ± 0.54                   | 5.50 ± 0.59         | 6.82 ± 1.48                   | 5.68 ± 0.55         |
| Insulin (μUI/mL)         | 20.27 ± 14.95                 | 13.86 ± 9.66        | 26.07 ± 12.76                 | 15.02 ± 8.00        |
| HOMA-IR                  | 5.22 ± 4.09                   | 4.49 ± 6.90         | 8.26 ± 4.86                   | 4.16 ± 2.46         |
| Total cholesterol, mg/dL | 191.55 ± 43.05                | 180.75 ± 39.83      | 167.53 ± 47.36                | 165.22 ± 38.22      |
| Non-HDL cholesterol      | 141.46 ± 40.55                | 126.67 ± 36.86      | 119.68 ± 44.73                | 115.09 ± 35.85      |
| HDL-c, mg/dL             | 50.08 ± 12.67                 | 52.35 ± 11.06       | 47.84 ± 8.99                  | 50.13 ± 11.22       |
| LDL-c, mg/dL             | 114.17 ± 34.93                | 104.93 ± 32.15      | 92.12 ± 36.89                 | 93.65 ± 32.06       |
| Triglycerides, mg/dL     | 134.40 ± 59.83                | 108.70 ± 57.00      | 155.96 ± 99.69                | 129.84 ± 75.43      |
| AST, U/L                 | 24.28 ± 13.10                 | 21.59 ± 8.36        | 24.25 ± 9.63                  | 22.53 ± 8.54        |
| ALT, U/L                 | 26.02 ± 19.76                 | 21.50 ± 7.87        | 26.81 ± 15.22                 | 23.25 ± 11.61       |
| GGT, U/L                 | 34.74 ± 34.83                 | 28.63 ± 26.79       | 37.87 ± 22.51                 | 28.47 ± 14.36       |

\*Data available for 77 patients.
